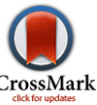

## Correction

# Correction: Coronary Flow Reserve in Pregnant Rats with Increased Left Ventricular Afterload

## The PLOS ONE Staff

The fourth author's name is spelled incorrectly. The correct name is David Johansen. The correct citation is: Songstad NT, Serrano MC, Sitrans V, Johansen D, Ytrehus K, et al. (2014) Coronary Flow Reserve in Pregnant Rats with Increased Left Ventricular Afterload. PLoS ONE 9(7): e102147. doi:10.1371/journal.pone.0102147.

## Reference

1. Songstad NT, Serrano MC, Sitrans V, Johansen D, Ytrehus K, et al. (2014) Coronary Flow Reserve in Pregnant Rats with Increased Left Ventricular Afterload. PLoS ONE 9(7): e102147. doi:10.1371/journal.pone.0102147

---

**Citation:** The PLOS ONE Staff (2014) Correction: Coronary Flow Reserve in Pregnant Rats with Increased Left Ventricular Afterload. PLoS ONE 9(10): e111272. doi:10.1371/journal.pone.0111272

**Published:** October 17, 2014

**Copyright:** © 2014 The PLOS ONE Staff. This is an open-access article distributed under the terms of the Creative Commons Attribution License, which permits unrestricted use, distribution, and reproduction in any medium, provided the original author and source are credited.
